# Supplementary material
Source: PubMed Central journal article supplement (PMC8765447)
Supplement: aac.01729-21-s0001.pdf [file aac.01729-21-s0001.pdf]

## Supplemental information for

### Effects of inactivation of D,D-transpeptidases of *Acinetobacter baumannii* on bacterial growth and susceptibility to $\beta$ -lactam antibiotics

Marta Toth<sup>a,#</sup>, Mijoon Lee<sup>a,b</sup>, Nichole K. Stewart<sup>a</sup>, and Sergei B. Vakulenko<sup>a,#</sup>

<sup>a</sup>Department of Chemistry and Biochemistry, University of Notre Dame, Notre Dame, IN, USA

<sup>b</sup>Mass Spectrometry and Proteomics Facility, University of Notre Dame, Notre Dame, IN, USA

#Address correspondence to Marta Toth, [mtoth1@nd.edu](mailto:mtoth1@nd.edu) and Sergei B. Vakulenko, [svakulen@nd.edu](mailto:svakulen@nd.edu)

**Table S1. Names of genes, loci, length, and molecular weight (MW) of penicillin-binding proteins (PBPs) of *A. baumannii* CIP 70.10, and amino acid sequence identity (similarity) to *P. aeruginosa* PAO1 transpeptidases.**

| PBP | Gene <sup>a</sup>           | ABCIP7010 locus | Number of amino acids | MW (Da) | Identity (similarity) <sup>b</sup> (%) |
|-----|-----------------------------|-----------------|-----------------------|---------|----------------------------------------|
| 1a  | <i>mrcA</i> ( <i>ponA</i> ) | 3385            | 851                   | 94,827  | 43.7 (73.2)                            |
| 1b  | <i>mrcB</i>                 | 2471            | 798                   | 88,256  | 42.2 (75.1)                            |
| 2   | <i>mrdA</i> ( <i>pbpA</i> ) | 1009            | 672                   | 74,452  | 47.0 (76.1)                            |
| 3   | <i>ftsI</i>                 | 3391            | 610                   | 67,659  | 40.1 (72.7)                            |

<sup>a</sup> Gene names for the corresponding PBPs of *A. baumannii* and *P. aeruginosa*. In some databases, the genes for PBP1a and PBP2 have alternative names in *P. aeruginosa* PAO1, which are given in parentheses.

<sup>b</sup> Identity (similarity) given for TPs only.

**Table S2. Bacterial strains and plasmid constructs used in this study**

| <b>Strains</b>                                | <b>Characteristics or genotype</b>                               | <b>Source</b>  |
|-----------------------------------------------|------------------------------------------------------------------|----------------|
| <i>E. coli</i> DH10B                          | The host for recombinant plasmids                                | NEB            |
| <i>A. baumannii</i> CIP 70.10                 | Parental wild-type strain                                        | ATCC 15151     |
| <b><i>A. baumannii</i> CIP 70.10 variants</b> |                                                                  |                |
| ΔPBP1a                                        | Deletion mutant of <i>mrcA</i> encoding PBP1a                    | This study     |
| ΔPBP1b                                        | Deletion mutant of <i>mrcB</i> encoding PBP1b                    | This study     |
| PBP1a(S/A)                                    | PBP1a mutant with Ser459Ala substitution                         | This study     |
| PBP1b(S/A)                                    | PBP1b mutant with Ser455Ala substitution                         | This study     |
| ΔPBP2                                         | Deletion mutant of <i>mrdA</i> encoding PBP2                     | This study     |
| PBP1a(S/A)+PBP1b(S/A)                         | Double mutant                                                    | This study     |
| ΔPBP1a+ΔPBP2                                  | Double mutant                                                    | This study     |
| ΔPBP1b+ΔPBP2                                  | Double mutant                                                    | This study     |
| PBP1a(S/A)+ΔPBP2                              | Double mutant                                                    | This study     |
| PBP1b(S/A)+ΔPBP2                              | Double mutant                                                    | This study     |
| PBP1a(S/A)+PBP1b(S/A)+ΔPBP2                   | Triple mutant                                                    | This study     |
| <b>Suicide Plasmids</b>                       |                                                                  |                |
| pMo130                                        | Allelic exchange suicide vector                                  | Addgene #27388 |
| pMT308FW                                      | Suicide vector for deletion of PBP1a                             | This study     |
| pMT309FW                                      | Suicide vector for deletion of PBP1b                             | This study     |
| pNS257                                        | Suicide vector for deletion of PBP2                              | This study     |
| pMT310FW                                      | Suicide vector for deletion of PBP3                              | This study     |
| pMT321FW                                      | Suicide vector for Ser459Ala substitution in the PBP1a TP domain | This study     |
| pMT322FW                                      | Suicide vector for Ser455Ala substitution in PBP1b TP domain     | This study     |

**Table S3. Steps of allelic exchange procedures, primers, and size of PCR products to generate and verify mutant derivatives of *A. baumannii* CIP 70.10**

| Steps                                                        | Primer's name and sequences                                                                                                         | PCR product length (bp) |
|--------------------------------------------------------------|-------------------------------------------------------------------------------------------------------------------------------------|-------------------------|
| <b>ΔPBP1a construct</b>                                      |                                                                                                                                     |                         |
| UR PCR amplification                                         | oNS159 GACACGGTAACCTAATTTTTGC<br>oNS158-Pho GGATAGCTTTTTTCATGATAAGTAAGC                                                             | 1116                    |
| DR PCR amplification                                         | oNS160 AATCAAATTGAGTAAAAATAAAAAAGCC<br>oNS161 CTATAATGCGGGGCAAAG                                                                    | 1046                    |
| PCR amplification of the ligated UR and DR                   | oNS163F TATATAGGATCCGACACGGTAACCTAATTTTTGC<br>oNS164 TATATAGGATCCCTATAATGCGGGGCAAAG                                                 | 2186                    |
| Sequencing of the insert cloned into the pMo130 vector       | oMT306 GGTTTACGATATAACCTGAGCACACTA<br>oMT307 GCATCTCCAGAACGTCGTATGCA<br>oNS185 TTTACCACGACCGCATTCTC<br>oNS186 CCTCTGACACATGCAGCTC   |                         |
| PCR amplification to confirm integration into the chromosome | oNS185 TTTACCACGACCGCATTCTC<br>oMT305 GCGAAGTCTTACCTCAAGTTGTGC                                                                      | 4850 or 2324            |
|                                                              | oMT300 GAACGTGCGACTTGAGGAGAAAAGC and<br>oNS186 CCTCTGACACATGCAGCTC                                                                  | 2308 or 4834            |
| Verification of the PBP1a gene deletion                      | oMT300 GAACGTGCGACTTGAGGAGAAAAGC<br>oMT305 GCGAAGTCTTACCTCAAGTTGTGC                                                                 | 2299                    |
| <b>ΔPBP1b construct</b>                                      |                                                                                                                                     |                         |
| UR PCR amplification                                         | oNS166 CGACATTGAGAGAGACACTATG<br>oNS165-Pho ACGTTCAAACCTCATATAAATGAGAT                                                              | 972                     |
| DR PCR amplification                                         | oNS167 AGTTATAACAATAAGCGTTAACAGG<br>oNS168 CGAGAAGTAGAACAATTAACGG                                                                   | 1034                    |
| PCR amplification of the ligated UR and DR                   | oNS170 TATATAGGATCCCGACATTGAGAGAGACACTATG<br>oNS171 TATATAGGATCCCGAGAAGTAGAACAATTAACGG                                              | 2029                    |
| Sequencing of the insert cloned into the pMo130 vector       | oMT316 GATGACAAGCTATCGCATCATTAAACG<br>oMT317 CCGACCATAAGTACAGCACCAATAT<br>oNS185 TTTACCACGACCGCATTCTC<br>oNS186 CCTCTGACACATGCAGCTC |                         |
| PCR amplification to confirm integration into the chromosome | oNS185 TTTACCACGACCGCATTCTC<br>oMT315 CTTATTCATCAGCCTTGGACATGGTA                                                                    | 4636 or 2269            |
|                                                              | oMT310 GGTACGACAAGCCATATAGAAATCATAAC<br>oNS186 CCTCTGACACATGCAGCTC                                                                  | 2186 or 4553            |
| Verification of the PBP1b gene deletion                      | oMT310 GGTACGACAAGCCATATAGAAATCATAAC<br>oMT315 CTTATTCATCAGCCTTGGACATGGTA                                                           | 2278                    |
| <b>ΔPBP2 construct</b>                                       |                                                                                                                                     |                         |
| UR PCR amplification                                         | oNS175 CAGCTTTACGTGGCACAATAC<br>oNS174 AAAGTGCTGTTTCATACGGATC                                                                       | 1039                    |
| DR PCR amplification                                         | oNS172-Pho GAGGTGCGATGAATAATGAAAAATC<br>oNS173 CTTAGCATGTTACCTGCGTTAG                                                               | 1145                    |
| PCR amplification of the ligated UR and DR                   | oNS177 TATATAGGATCCCAGCTTTACGTGGCACAATAC<br>oNS176 TATATAGGATCCCTTAGCATGTTACCTGCGTTAG                                               | 2208                    |
| Sequencing of the insert cloned into the pMo130 vector       | oMT326 GCGCTTGCGTTAGAATAAGCAGCTA<br>oMT327 ATCGGGAGTTGGTCTTAATCCTTCA<br>oNS185 TTTACCACGACCGCATTCTC                                 |                         |

|                                                              |                                                                                                                                                                                                                |                  |
|--------------------------------------------------------------|----------------------------------------------------------------------------------------------------------------------------------------------------------------------------------------------------------------|------------------|
|                                                              | oNS186 CCTCTGACACATGCAGCTC                                                                                                                                                                                     |                  |
| PCR amplification to confirm integration into the chromosome | oNS184 AAATAGGCGTATCACGAGGC<br>oMT320 GTTCAAATCCGACTTGCTCACCA                                                                                                                                                  | 4447 or<br>2458  |
|                                                              | oMT338 GATGTCATGGACCAAGATGCAAAACG<br>oNS185 TTTACCACGACCGCATTCTC                                                                                                                                               | 2427 or<br>4416  |
| Verification of the PBP2 gene deletion                       | oMT320 GTTCAAATCCGACTTGCTCACCA<br>oMT338 GATGTCATGGACCAAGATGCAAAACG                                                                                                                                            | 2478             |
| <b>ΔPBP3 construct</b>                                       |                                                                                                                                                                                                                |                  |
| UR PCR amplification                                         | oNS181 GAATTATGGCAGACTTAGGTGTG<br>oNS180 TCGCTTATCTACCATACAGCAAG                                                                                                                                               | 999              |
| DR PCR amplification                                         | oNS178-Pho CCTATTCGCAGGTAAGCTATG<br>oNS179 CAATGCCTGTAAATCGAAAC                                                                                                                                                | 987              |
| PCR amplification of the ligated UR and DR                   | oNS183 TATATAGGATCCGAATTATGGCAGACTTAGGTGTG<br>oNS182 TATATAGGATCCCAATGCCTGTAAATCGAAAC                                                                                                                          | 2010             |
| Sequencing of the insert cloned into the pMo130 vector       | oMT336 ACCGATGACCTCAGAGCAAATAAGTA<br>oMT337 AGGCTGGCTATAACTTGTCAAAGCA<br>oNS185 TTTACCACGACCGCATTCTC<br>oNS186 CCTCTGACACATGCAGCTC                                                                             |                  |
| PCR amplification to confirm integration into the chromosome | oNS185 TTTACCACGACCGCATTCTC<br>oMT335 GGTGTATGCGCATAATCCACTACA                                                                                                                                                 | 3961 or<br>2158  |
|                                                              | oMT330 AGACCCTCAAGCTCTGGAAGTTG<br>oNS186 CCTCTGACACATGCAGCTC                                                                                                                                                   | 2205 or<br>4008  |
| Verification of the PBP3 gene deletion                       | oMT335 GGTGTATGCGCATAATCCACTACA<br>oMT330 AGACCCTCAAGCTCTGGAAGTTG                                                                                                                                              | 4009 and<br>2207 |
| <b>PBP1a(S/A) construct</b>                                  |                                                                                                                                                                                                                |                  |
| UR PCR amplification                                         | oMT352 TATTGGATCCTTACTTATCATGAAAAAGCTATCCAGTTTG<br>oMT351 GCCAGCCTTGTAAGCACGGT                                                                                                                                 | 1382             |
| DR PCR amplification                                         | oMT350-Pho GTCAGCCAGGTGCAACCATCAAACCATTC<br>oMT353 TATAGGATCCAGAACGTCGTATGCAACTAGAACAGA                                                                                                                        | 1317             |
| PCR amplification of the ligated UR and DR                   | oMT352 TATTGGATCCTTACTTATCATGAAAAAGCTATCCAGTTTG<br>oMT353 TATAGGATCCAGAACGTCGTATGCAACTAGAACAGA                                                                                                                 | 2700             |
| Sequencing of the insert cloned into the pMo130 vector       | oMT308 GCTGAGCTTGACGATATTGACTGT<br>oMT309 CCAAATGGCCATGATTGCCG<br>oNS185 TTTACCACGACCGCATTCTC<br>oNS186 CCTCTGACACATGCAGCTC                                                                                    |                  |
| PCR amplification to confirm integration into the chromosome | oNS185 TTTACCACGACCGCATTCTC<br>oMT305 GCGAAGTCTTACCTCAAGTTGTGC                                                                                                                                                 | 3769             |
|                                                              | oMT300 GAACGTCGACTTGAGGAGAAAAGC<br>oNS186 CCTCTGACACATGCAGCTC                                                                                                                                                  | 3918             |
| Screening for the <b>Ala</b> Mutation                        | oMT355-Ala CGTCAGCCAGGT <b>GCAAC</b><br>oMT305 GCGAAGTCTTACCTCAAGTTGTGC                                                                                                                                        | 2310             |
| Verification of the PBP1a(S/A) mutant                        | oMT306 GGTTTACGATATAACCTGAGCACACTA<br>oMT305 GCGAAGTCTTACCTCAAGTTGTGC                                                                                                                                          | 3857             |
| Sequencing primers                                           | oMT301 GCCATAGAATCCCATCGGAAGTGA<br>oMT304 GTGAGGAAATTGTGATTCCTTCCAAG<br>oMT306 GGTTTACGATATAACCTGAGCACACTA<br>oMT307 GCATCTCCAGAACGTCGTATGCA<br>oMT308 GCTGAGCTTGACGATATTGACTGT<br>oMT309 CCAAATGGCCATGATTGCCG |                  |

|                                                              |                                                                                                                                                                                                                         |      |
|--------------------------------------------------------------|-------------------------------------------------------------------------------------------------------------------------------------------------------------------------------------------------------------------------|------|
| <b>PBP1b(S/A) construct</b>                                  |                                                                                                                                                                                                                         |      |
| UR PCR amplification                                         | oMT358 ATAT <u>GGATCC</u> ATTTATATGAAGTTTGAACGTGGTATCG<br>oMT357 GCACCGACTTGGCGTTTTGCATCT                                                                                                                               | 1378 |
| DR PCR amplification                                         | oMT356-Pho ATTATTGAAACCTGTCATTTATTTGAGCGCA<br>oMT359 AATAGGATCCTGTTTCCTGTTAACGCTTAGTTGTTAT                                                                                                                              | 1056 |
| PCR amplification of the ligated UR and DR                   | oMT358 ATAT <u>GGATCC</u> ATTTATATGAAGTTTGAACGTGGTATCG<br>oMT359 AATAGGATCCTGTTTCCTGTTAACGCTTAGTTGTTAT                                                                                                                  | 2437 |
| Sequencing of the insert cloned into the pMo130 vector       | oMT318 GGTTTGTTGTACGTTTAGACCATAACGA<br>oMT319 GACCCTCACCCAACAGTTAGTCA<br>oNS185 TTTACCACGACCGCATTCTC<br>oNS186 CCTCTGACACATGCAGCTC                                                                                      |      |
| PCR amplification to confirm integration into the chromosome | oNS185 TTTACCACGACCGCATTCTC<br>oMT315 CTTATTCATCAGCCTTGGACATGGTA                                                                                                                                                        | 3685 |
|                                                              | oMT310 GGTACGACAAGCCATATAGAAATCATAAC<br>oNS186 CCTCTGACACATGCAGCTC                                                                                                                                                      | 3550 |
| Screening for the <b>Ala</b> Mutation                        | oMT361Ala CGCCAAGTCGGT <b>GCA</b> TT<br>oMT315 CTTATTCATCAGCCTTGGACATGGTA                                                                                                                                               | 2252 |
| Verification of the PBP1b(S/A) mutant                        | oMT310 GGTACGACAAGCCATATAGAAATCATAAC<br>oMT315 CTTATTCATCAGCCTTGGACATGGTA                                                                                                                                               | 4645 |
| Sequencing primers                                           | oMT311 GTCCAGCGCTGTCCTTCAAAT<br>oMT314 GGATGATAATACCGACAGTTATATTCGTGA<br>oMT316 GATGACAAGCTATCGCATCATTAACG<br>oMT317 CCGACCATAAGTACAGCACCAATAT<br>oMT318 GGTTTGTTGTACGTTTAGACCATAACGA<br>oMT319 GACCCTCACCCAACAGTTAGTCA |      |

Pho, phosphorylated at 5'; bp, base pairs; UR, upstream region; DR, downstream region; (S/A), the catalytic Ser to Ala substitution in the transpeptidase domain of bifunctional PBPs; Δ, deletion of a gene; the underlined GGATCC sequence represents the BamHI site; the **GCA** sequence in bold indicates the codon for alanine.

**Table S4. Genomic mutations of *A. baumannii* CIP 70.10 mutants.** Comparative genomic analysis of whole genome sequencing data was performed with a stringent quality threshold to verify gene inactivation and/or mutations.

| ABCIP7010 locus                                                                    | Position <sup>a</sup> | Read depth matrix <sup>b</sup> |         |    |                     |                |                |                             | Mutation            | Mutation Type | Variant Type         | Gene        | Protein Product    |
|------------------------------------------------------------------------------------|-----------------------|--------------------------------|---------|----|---------------------|----------------|----------------|-----------------------------|---------------------|---------------|----------------------|-------------|--------------------|
|                                                                                    |                       | 1a(S/A)                        | 1b(S/A) | Δ2 | 1a(S/A)<br>+1b(S/A) | 1a(S/A)<br>+Δ2 | 1b(S/A)<br>+Δ2 | 1a(S/A)<br>+1b(S/A)<br>+ Δ2 |                     |               |                      |             |                    |
| 3385                                                                               | 3597429               | 96                             | 0       | 0  | 78                  | 68             | 0              | 84                          | T>G                 | S459A         | Complex <sup>c</sup> | <i>mrcA</i> | PBP1a              |
|                                                                                    | 3597431               | 96                             | 0       | 0  | 78                  | 68             | 0              | 84                          | T>A                 |               |                      |             |                    |
| 2471                                                                               | 2635740               | 0                              | 54      | 0  | 64                  | 0              | 74             | 46                          | T>G                 | S455A         | Complex <sup>c</sup> | <i>mrcB</i> | PBP1b              |
|                                                                                    | 2635742               | 0                              | 54      | 0  | 64                  | 0              | 74             | 46                          | T>A                 |               |                      |             |                    |
| 0499                                                                               | 528612                | 0                              | 0       | 54 | 0                   | 72             | 68             | 66                          | T>G                 | I17S          | SNP <sup>d</sup>     |             | Gluconate permease |
| <b>Presence of in-frame deletion of <i>mrdA</i> gene in chromosome<sup>e</sup></b> |                       |                                |         |    |                     |                |                |                             |                     |               |                      |             |                    |
| 1009                                                                               | c1074099-1072111      | -                              | -       | +  | -                   | +              | +              | +                           | Deletion of 1989 bp |               |                      | <i>mrdA</i> | PBP2               |

<sup>a</sup> Position of mutation in the chromosome of *A. baumannii* CIP 70.10 (Accession number LN865143.1)

<sup>b</sup> Number of times each nucleotide in the genome was read

<sup>c</sup> Indicates two bases were mutated within the same codon

<sup>d</sup> Single nucleotide polymorphism

<sup>e</sup> (+) indicates in-frame deletion of *mrdA*, while (-) indicates no change

Abbreviations: PBP, penicillin-binding protein; 1a(S/A) and 1b(S/A), Ser to Ala substitution in the transpeptidase domain of PBP1a and PBP1b, respectively; Δ2, deletion of PBP2.

**Table S5. The list of 20 mucopeptide products generated from digestion of *A. baumannii* sacculus with mutanolysin.**

| Peaks <sup>a</sup> | Proposed mucopeptide structure | Measured $m/z^b$<br>[M + zH] <sup>z+</sup> | Theoretical $m/z$<br>[M + zH] <sup>z+</sup> | $z^c$ |
|--------------------|--------------------------------|--------------------------------------------|---------------------------------------------|-------|
| 1                  | Tri-Ala-Gly                    | 999.4344                                   | 999.4364                                    | 1     |
| Tetra              | Tetra                          | 942.4145                                   | 942.4150                                    | 1     |
| 2                  | Tri-Gly-Ala                    | 999.4345                                   | 999.4364                                    | 1     |
| 3                  | Tri-Ala-Ala = Penta            | 1013.4504                                  | 1013.4521                                   | 1     |
| TriTetra           | TriTetra                       | 897.8892                                   | 897.8911                                    | 2     |
| 4                  | TriPenta                       | 933.4073                                   | 933.4097                                    | 2     |
| Tetra2             | Tetra2                         | 933.4074                                   | 933.4097                                    | 2     |
| 5                  | TetraPenta                     | 968.9255                                   | 968.9283                                    | 2     |
| Tri2Tetra          | Tri2Tetra                      | 1324.0677                                  | 1324.0712                                   | 2     |
|                    |                                | 883.0475                                   | 883.0499                                    | 3     |
| 6                  | Tetra2*                        | 923.3941                                   | 923.3966                                    | 2     |
| TriTetra2          | TriTetra2                      | 1359.5851                                  | 1359.5897                                   | 2     |
|                    |                                | 906.7257                                   | 906.7289                                    | 3     |
| 7                  | Tetra2**                       | 923.3939                                   | 923.3966                                    | 2     |
| Tetra3             | Tetra3                         | 1395.1044                                  | 1395.1083                                   | 2     |
|                    |                                | 930.4051                                   | 930.4079                                    | 3     |
| 8                  | TetraPenta*                    | 958.9123                                   | 958.9152                                    | 2     |
| 8                  | Tetra2Penta                    | 1430.6229                                  | 1430.6268                                   | 2     |
|                    |                                | 954.0840                                   | 954.0870                                    | 3     |
| TriTetraA          | TriTetraA                      | 887.8762                                   | 887.8780                                    | 2     |
| TriTetraA'         | TriTetraA'                     | 887.8763                                   | 887.8780                                    | 2     |
| 9                  | TriPentaA                      | 923.3941                                   | 923.3966                                    | 2     |
| Tetra2A            | Tetra2A                        | 923.3939                                   | 923.3966                                    | 2     |
| 10                 | TriPentaA'                     | 923.3943                                   | 923.3966                                    | 2     |

<sup>a</sup> Peaks labeled by number or by structure as shown Figure 2; <sup>b</sup>  $m/z$ , mass to charge ratio; <sup>c</sup>  $z$ , charge state.



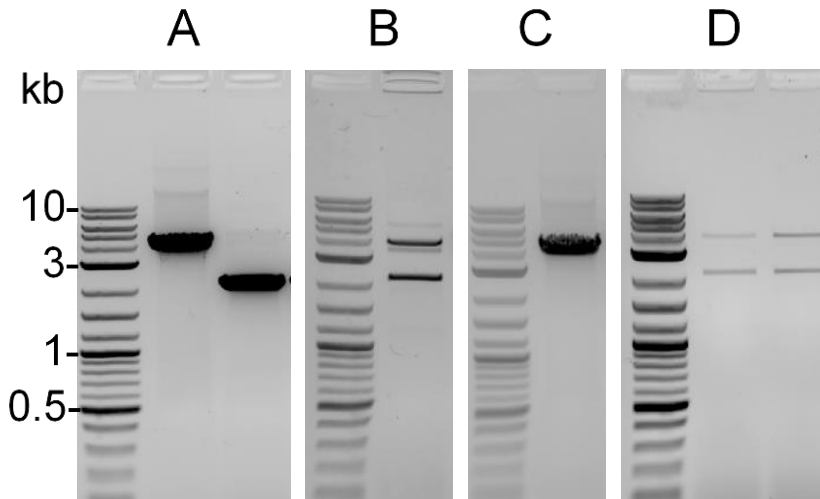

**Figure S1. PCR fragments generated to verify integration and excision events during attempts to construct the *ftsI* gene deletion mutant of *A. baumannii* CIP 70.10.** A. The size of PCR fragments (3961 bp and 2205 bp; see Table S3) confirms integration of the pMT310FW vector into the upstream homologous region of the chromosome (see Materials and Methods). B. The size of PCR fragments confirms excision from the chromosome generates both the *ftsI* gene deletion (2207 bp fragment) and the restoration of the wild-type chromosomal arrangement (4009 bp fragment). C. Analysis of hundreds of individual colonies obtained following selection on sucrose revealed the presence of only the wild-type chromosomal arrangement (4009 bp fragment). D. In a few colonies (two of them are shown), presence of both the wild type and the *ftsI* deletion mutant was observed. Following the subsequent round of sucrose selection, the DNA from all recovered colonies showed only the wild-type chromosomal arrangement as shown in panel C.

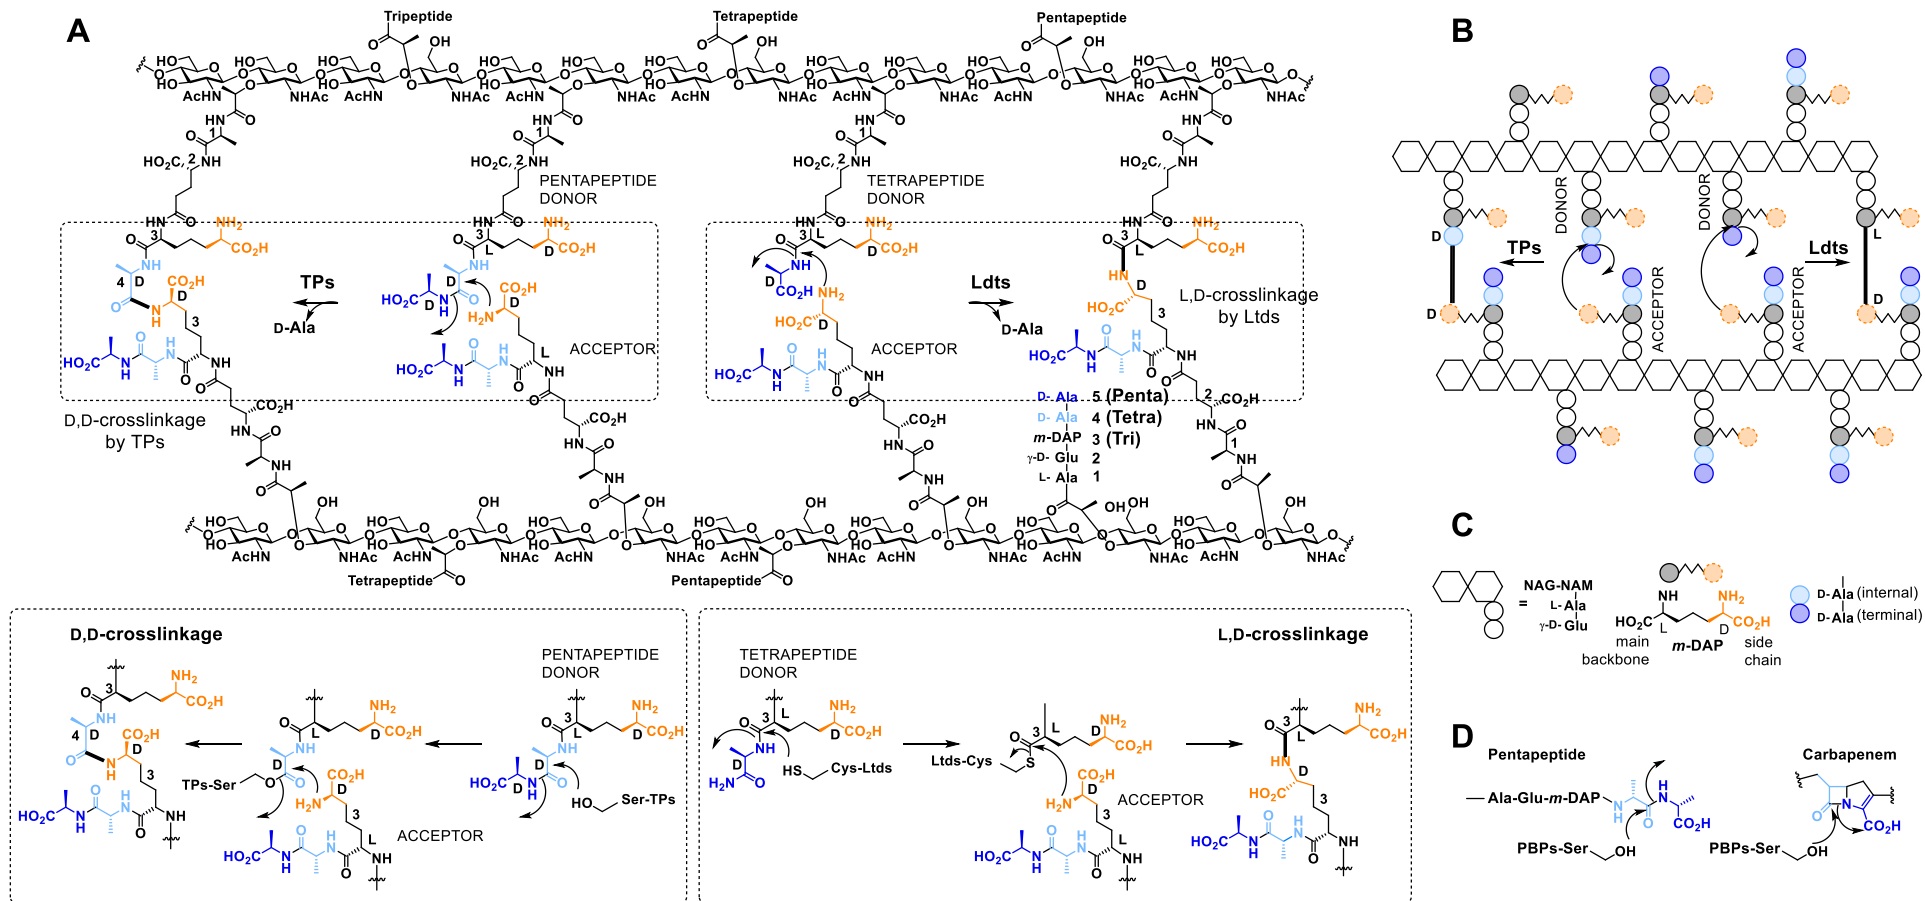

**Figure S2. Peptidoglycan crosslinking.** A. Crosslinking catalyzed by D,D-transpeptidases (TPs) and L,D-transpeptidases (Ldts). B. Cartoon representation of these reactions. C. Illustration of cartoon keys. D. Inhibition of a D,D-transpeptidase by a carbapenem.

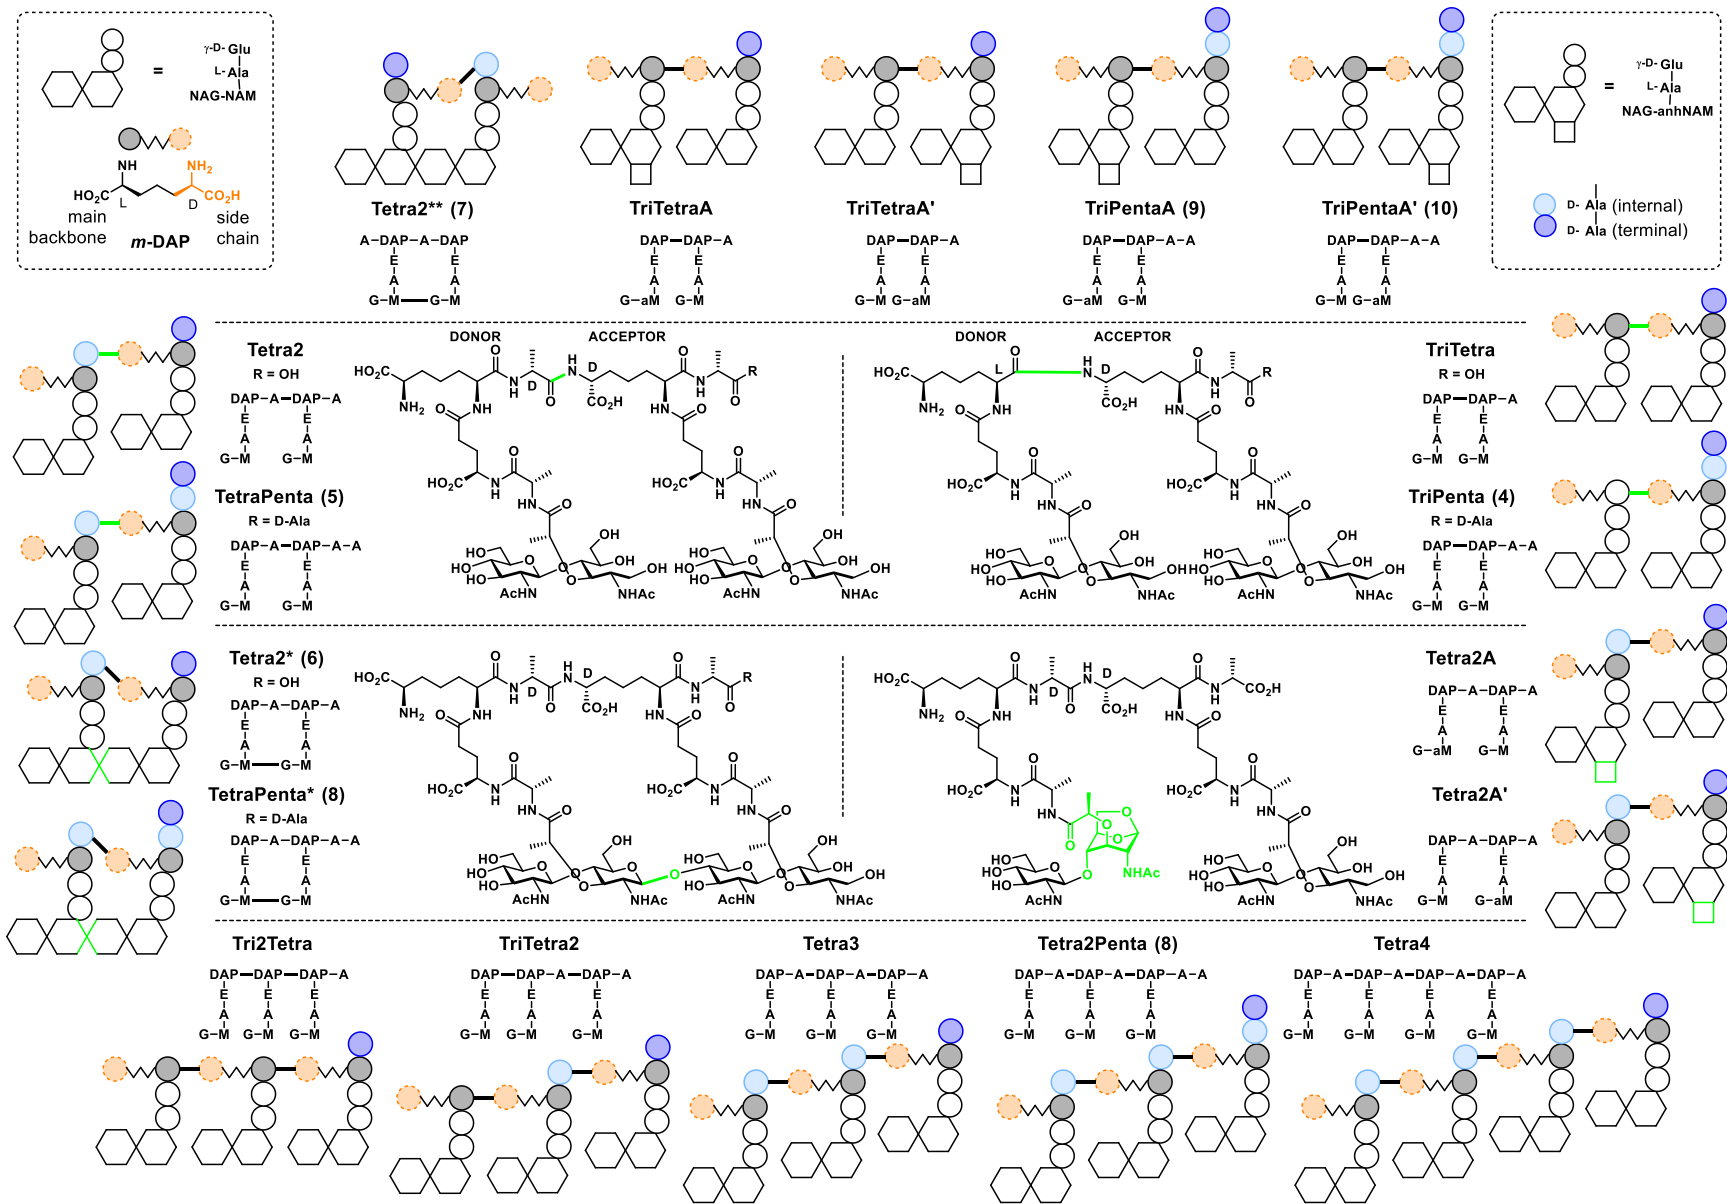

**Figure S3. The proposed chemical structures and cartoon representation of crosslinked mucopeptides indicated in Figure 2.** The muramic acid at the reducing end was reduced to muramitol for simpler chromatograms. A distinctive feature in structures is colored in green. A = Ala, E =  $\gamma$ -D-Glu, DAP = *meso*-diaminopimelic acid, G-M = GlcNAc-MurNAc; G-aM = GlcNAc-1,6-anhydro-MurNAc. For mucopeptides name's ending with A, one of G-M is replaced by G-aM.

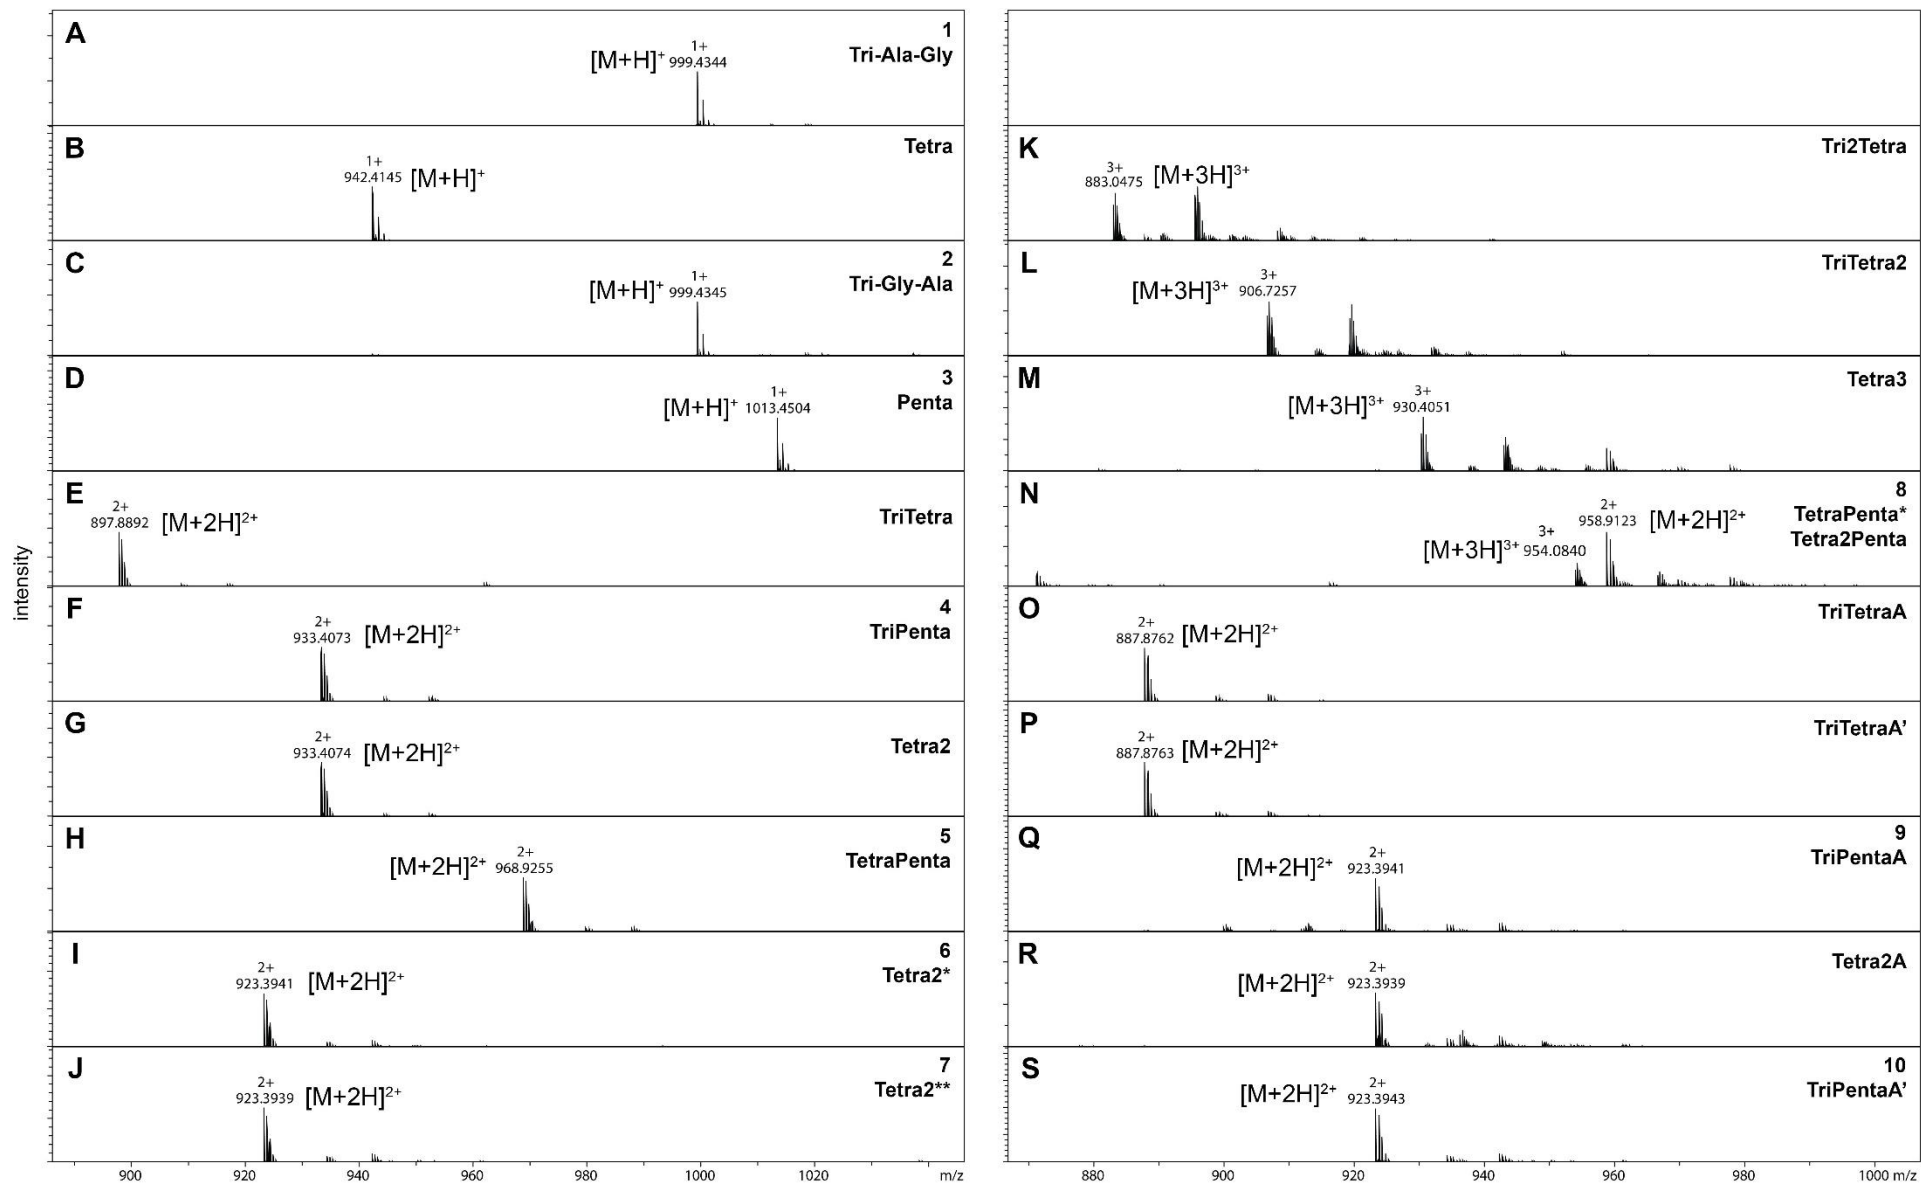

Figure S4. Mass spectra of 20 muuropeptide products shown in Figure 2 and Table S5.

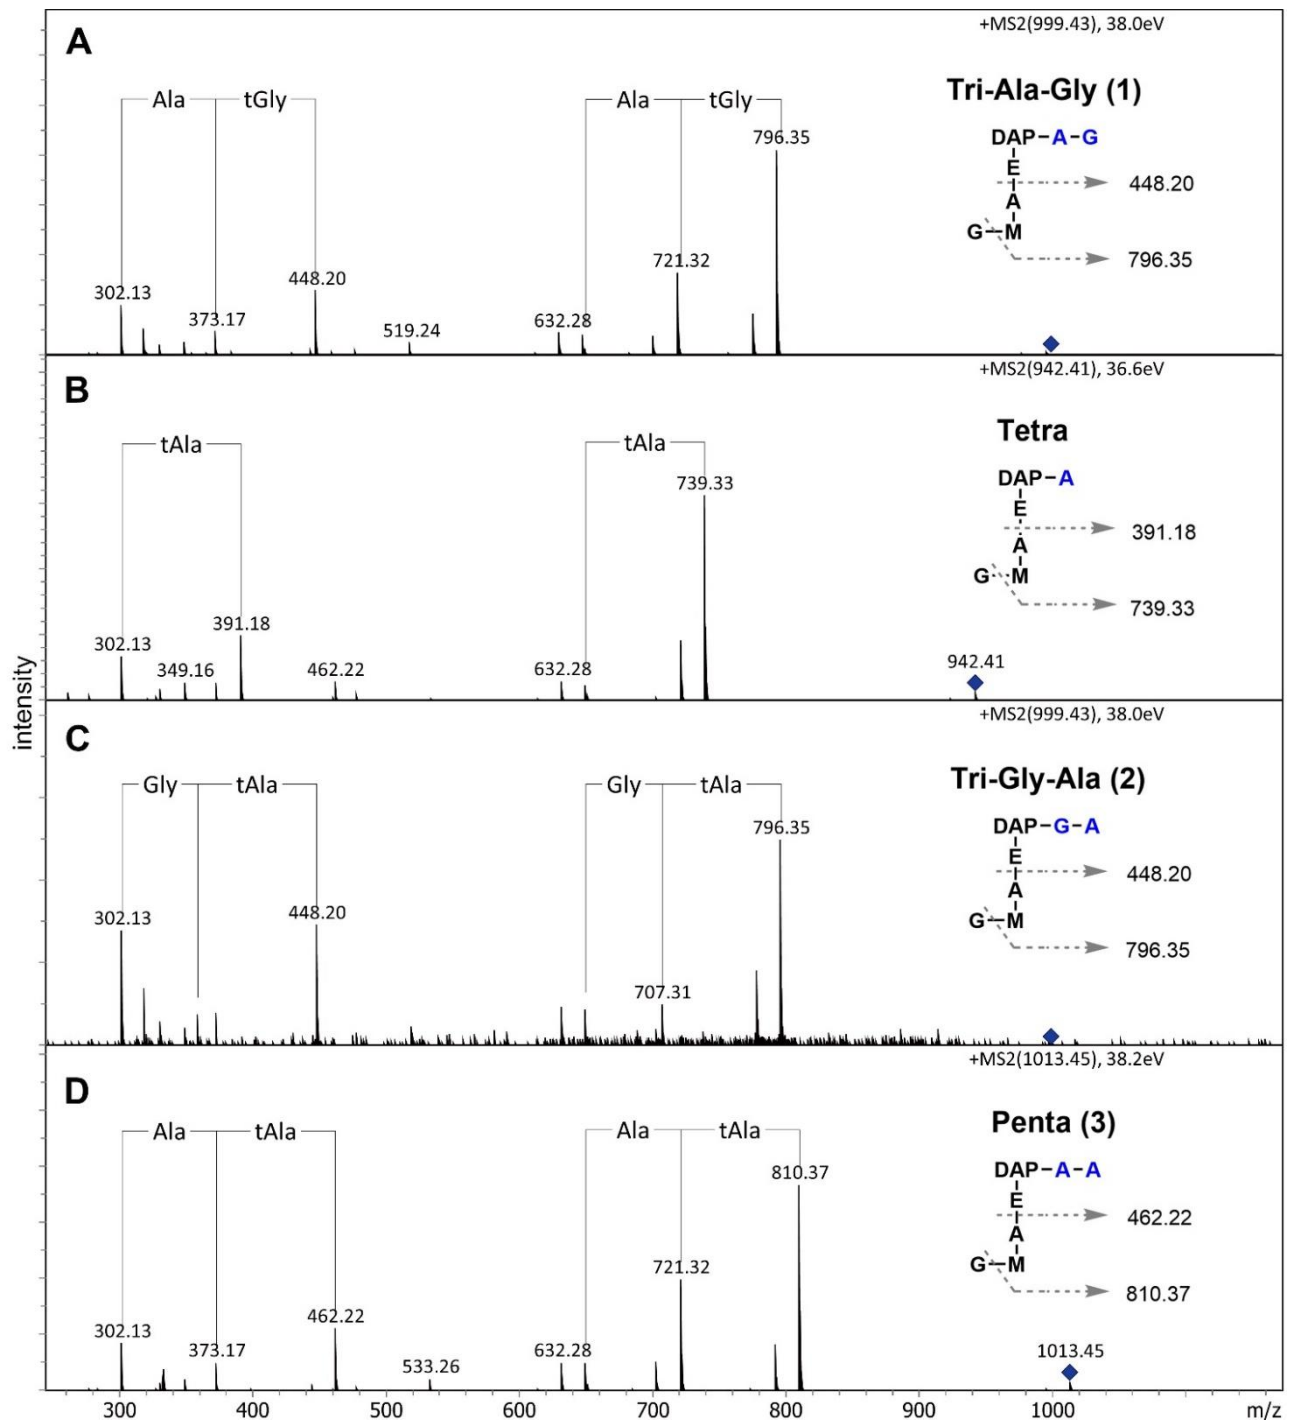

**Figure S5. Collision induced dissociation (CID) mass spectra of protonated non-crosslinked muopeptides 1 (A), Tetra (B), 2 (C), and 3 (D).** The fragment ion generated by the loss of dehydro NAG (203 Da) from the corresponding precursor ion is the most abundant ion. tAla represents a loss of terminal Ala (89.05 Da), while Ala indicates loss of internal Ala (71.04 Da). tGly represents a loss of terminal Gly (75.03 Da), while Gly indicates loss of internal Gly (57.03 Da). The peptide sequence of muopeptides was determined using signature ions generated by the concomitant loss of dehydroNAG and a terminal amino acid and/or an internal amino acid.

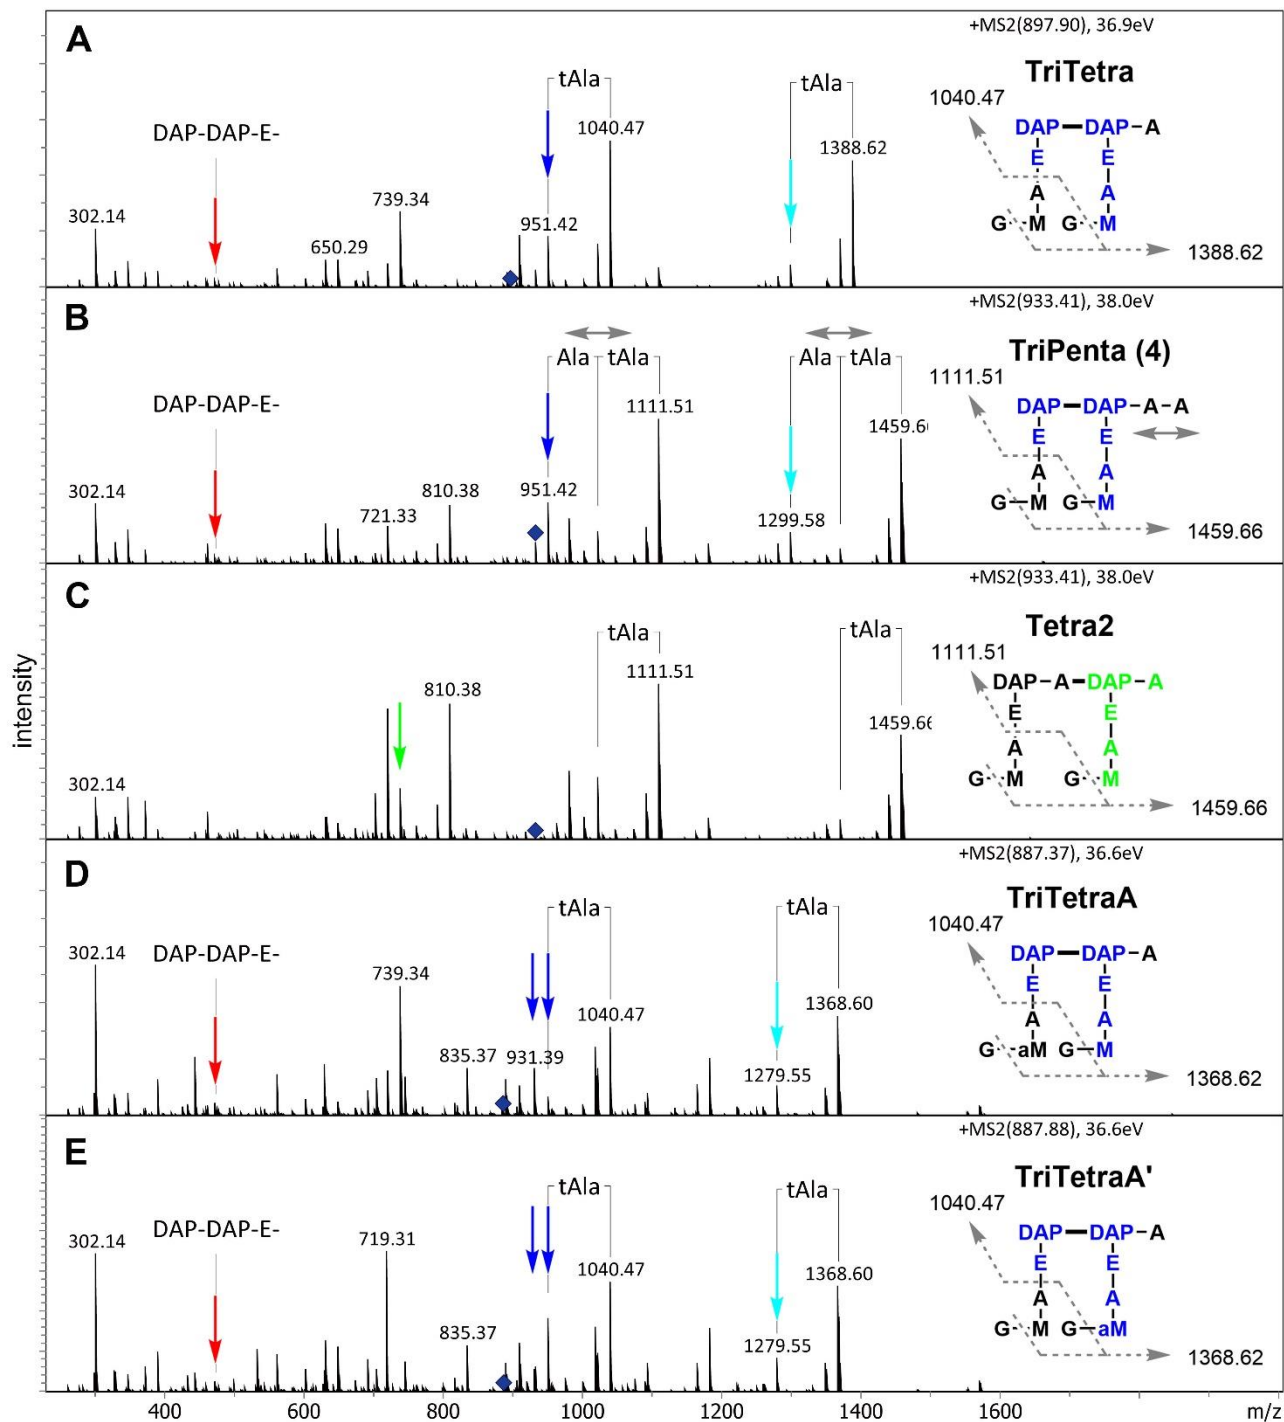

**Figure S6. CID mass spectra of protonated L,D-crosslinked muropeptides TriTetra (A), 4 (B), TriTetraA (D), TriTetraA' (E) and D,D-crosslinked muropeptide Tetra2 (C).** The L,D-crosslink was confirmed by the presence of fragment ions only existing in the L,D-crosslink (not D,D-crosslink) –  $m/z$  474.22 (DAP-DAP-E-, indicated with a red arrow),  $m/z$  951.42 (-E-DAP-DAP-E-A-M-, indicated with a blue arrow) and/or  $m/z$  931.38 (-E-DAP-DAP-E-A-aM-, indicated with a blue arrow),  $m/z$  1299.58 (-M-A-E-DAP-DAP-E-A-M-, indicated with a cyan arrow) and/or  $m/z$  1279.55 (-M-A-E-DAP-DAP-E-A-aM-, indicated with a cyan arrow). The peak at  $m/z$  739.34 (-M-A-E-DAP-A, indicated with a green arrow) in panel (C) only exists from the precursor ion  $m/z$  933.41 with a D,D-crosslink. The presence of -A-A was confirmed by the presence of fragment ions by the concomitant loss of Ala and tAla, indicated with a gray double arrow.

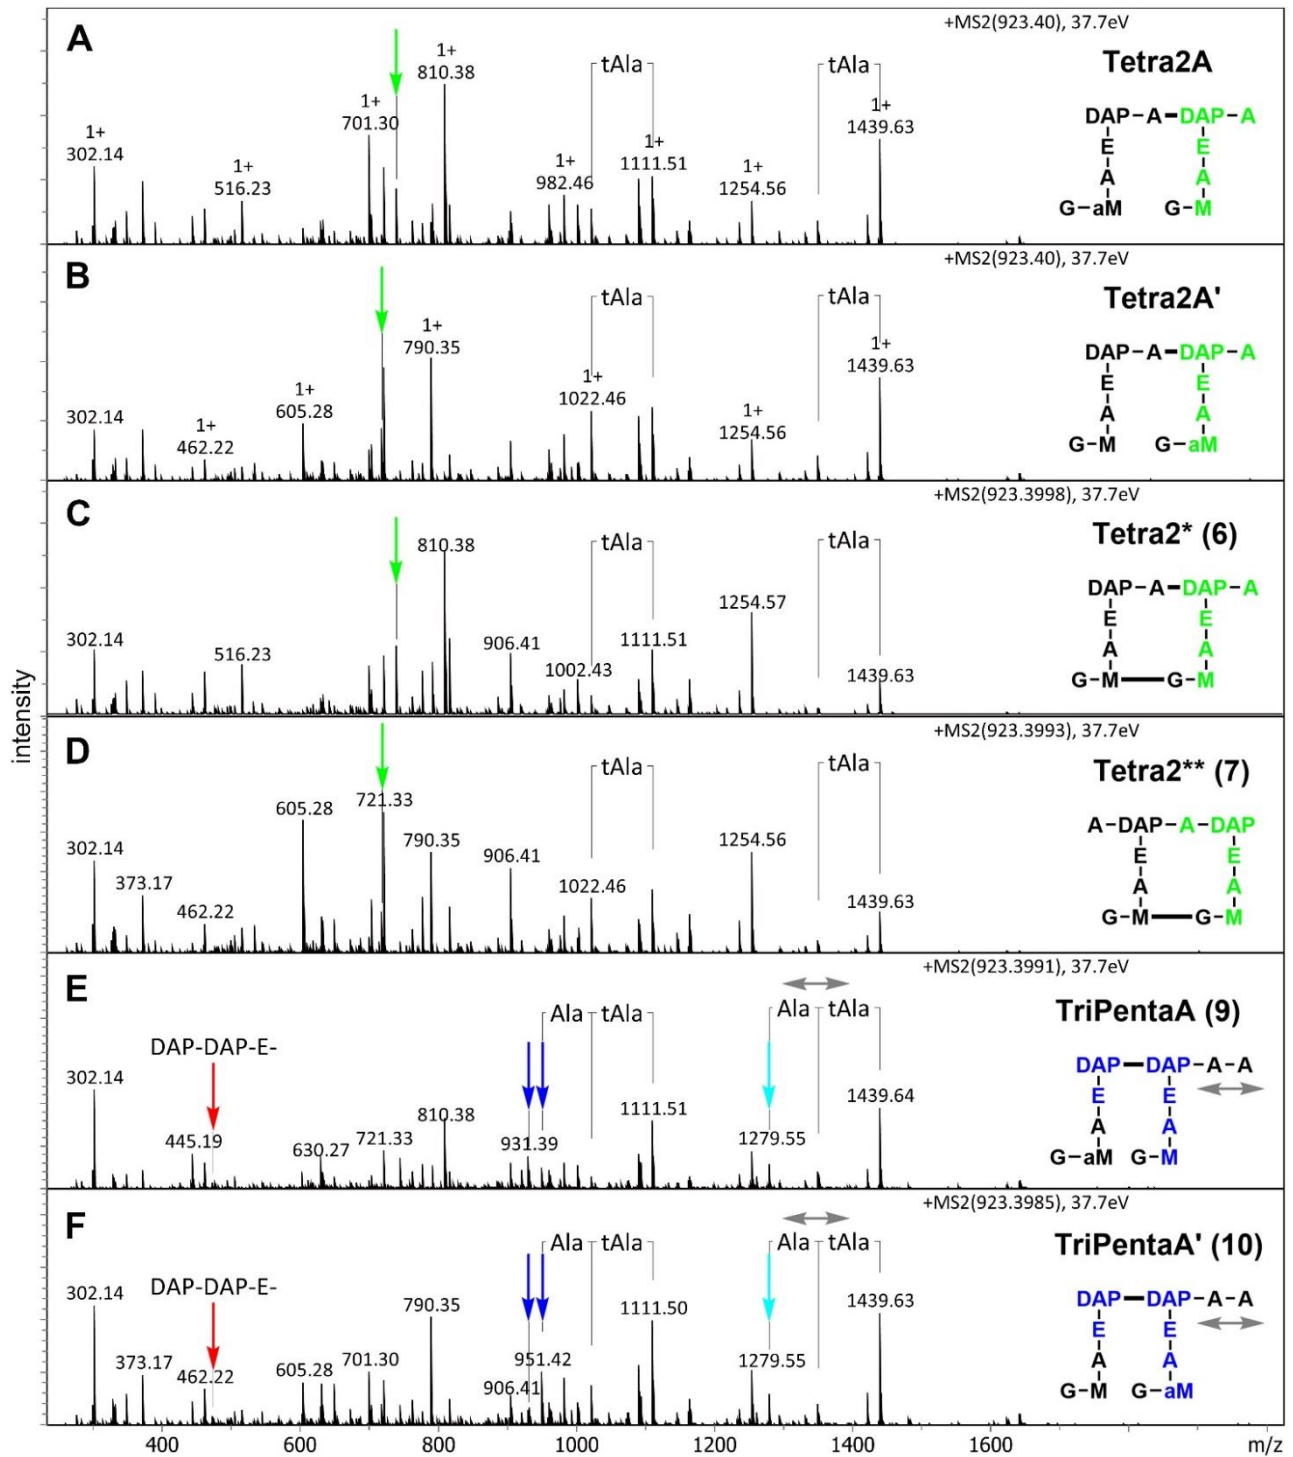

**Figure S7. CID mass spectra of protonated crosslinked mucopeptides with  $m/z$  923.40.** Peaks with green arrows only exist in structures with the D,D-crosslink, while peaks with blue, cyan, red and gray arrows support the structures with the L,D-crosslink as explained in Figure S6.

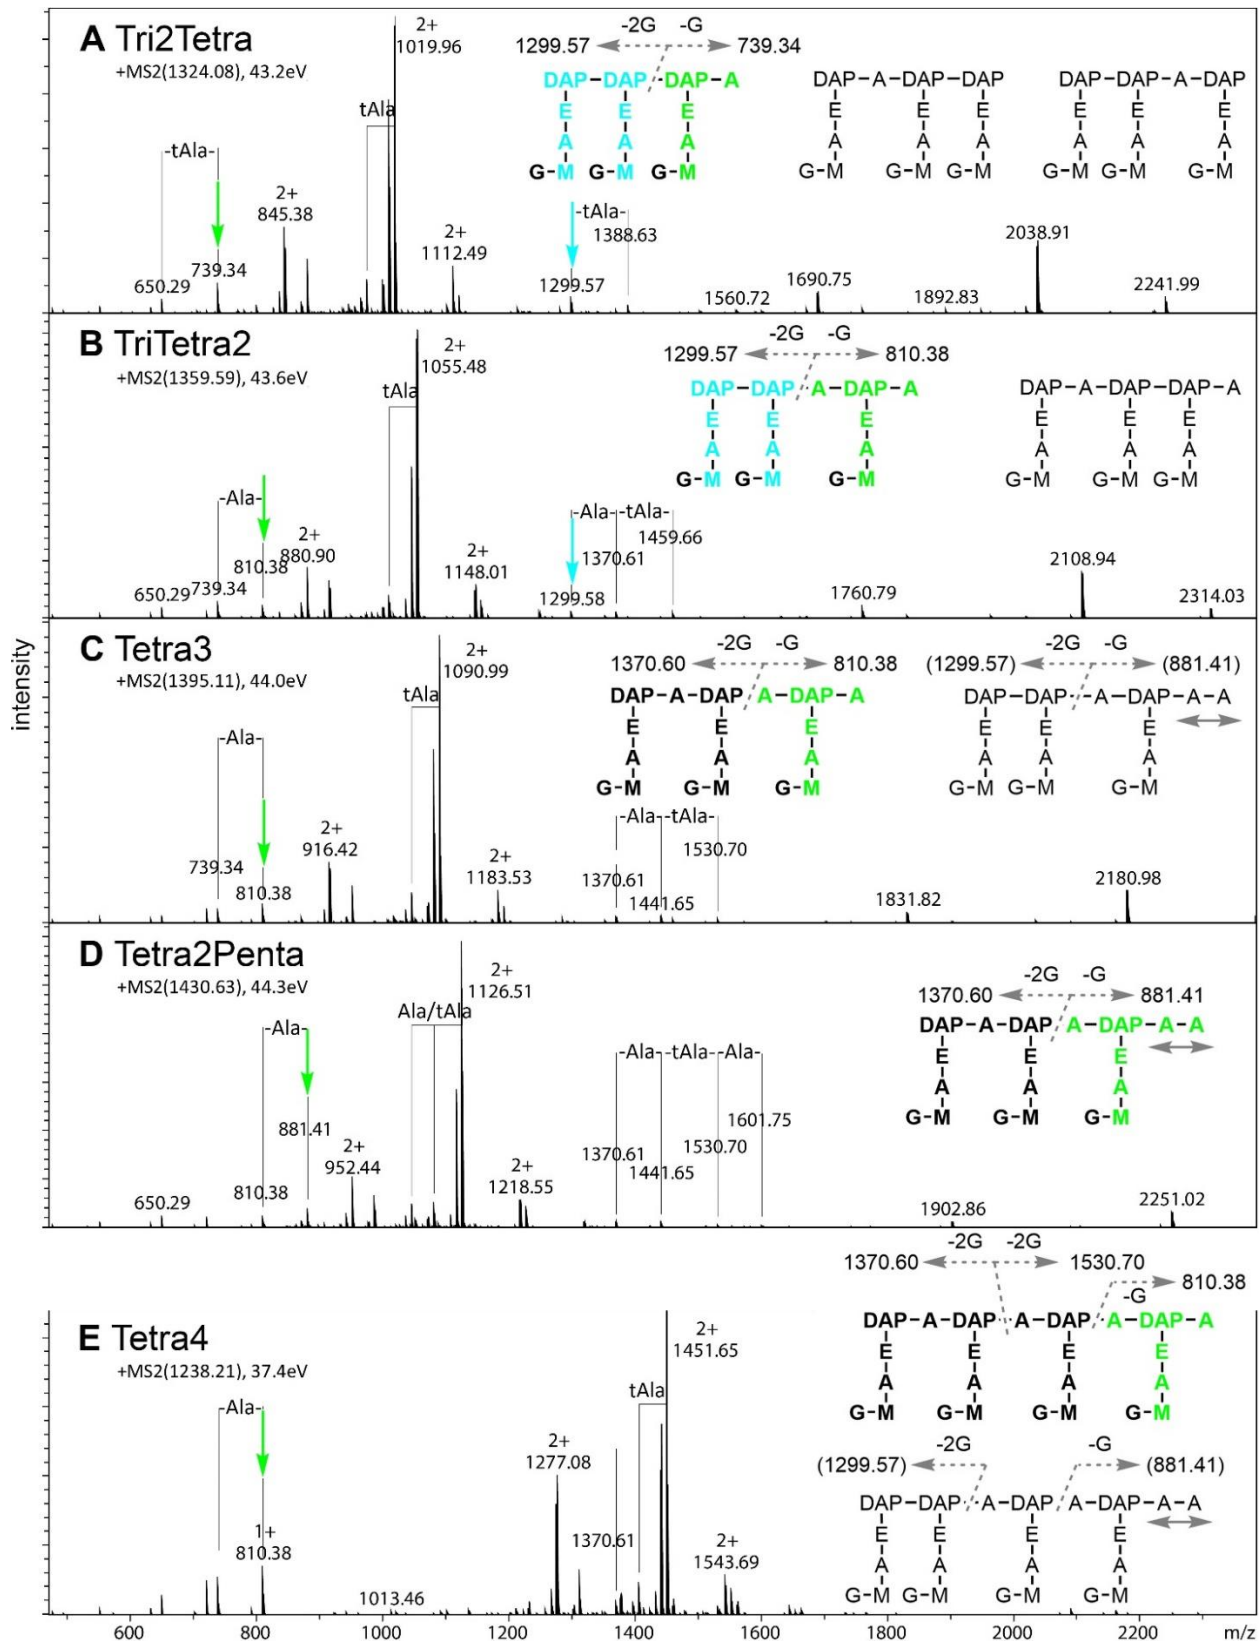

**Figure S8. CID mass spectra of protonated crosslinked muopeptides (trimers and tetramer).** All five muopeptides form fragment ions generated by a loss of a terminal Ala (tAla) at the acceptor strand of the corresponding crosslinked peptides. The structures were determined using the presence of signature ions (indicated with green arrows) existing only in the proposed structure and/or the absence of ions ( $m/z$  values in parentheses) existing only in alternative structures colored in dark gray.
